# Supplementary material for: The VIP-VPAC2 neuropeptidergic axis is a cellular pacemaking hub of the suprachiasmatic nucleus circadian circuit
Source: PubMed Central journal article supplement (PMC7341843; doi:10.1038/s41467-020-17110-x), 2020-07-07
Supplement: 41467_2020_17110_MOESM4_ESM.pdf [file 41467_2020_17110_MOESM4_ESM.pdf]

## **Description of Additional Supplementary Files**

**File Name:** Supplementary Movie 1

**Description:** CCD time-lapse video of Per2::Luciferase bioluminescent emissions from an explant SCN culture recorded over 5-6 days. Note the stereotypical spatiotemporal waves of Per2::Luciferase bioluminescence that persist from cycle-to-cycle.
